# Supplementary material
Source: PubMed Central journal article supplement (PMC5033628)

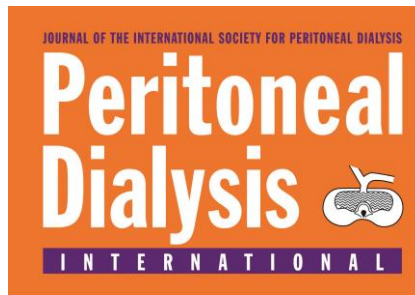

### Supplemental Materials for

## The Trio Trial – A Randomized Controlled Clinical Trial Evaluating the Effect of a Biocompatible Peritoneal Dialysis Solution on Residual Renal Function

*Tabo Sikaneta, George Wu, Mohamed Abdoell, Anita Ng, Sara Mahdavi, Anton Svendrovski, Tony Tu, Trish Mercer, Matthew Tong and Paul Tam*

Supplement Figure 1: Protein catabolic rates by PD solution

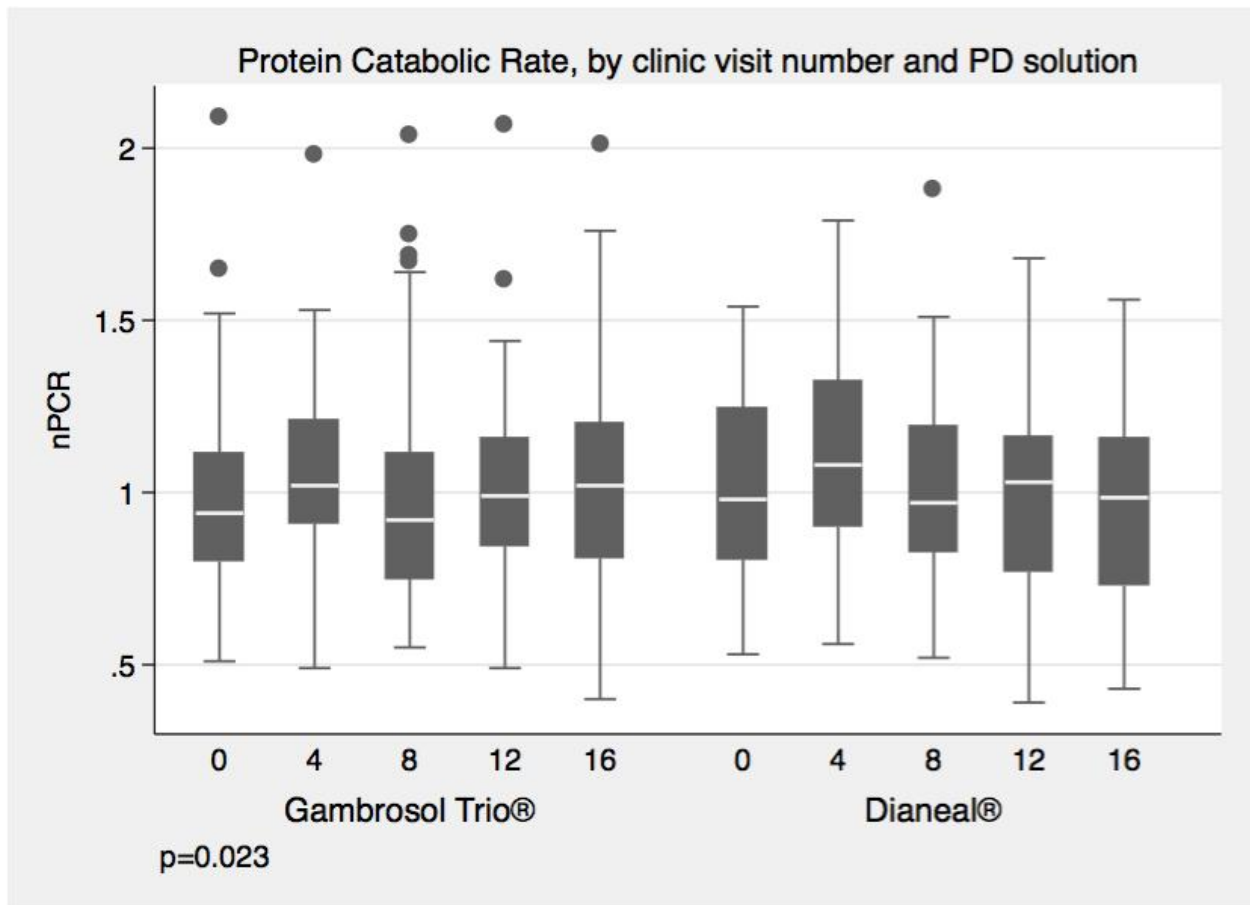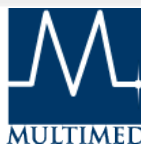

Supplement Figure 2: Total body water stores by bioimpedence assay

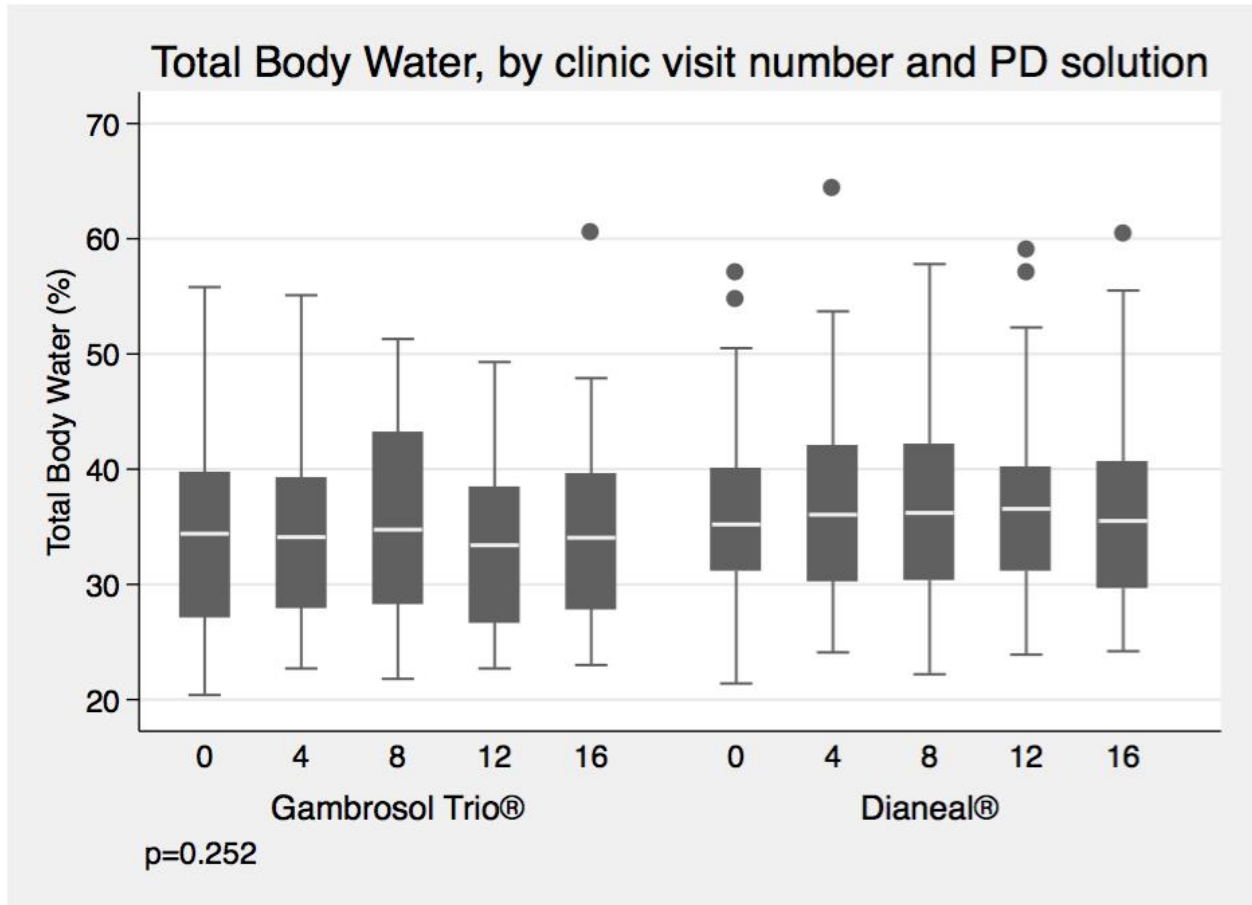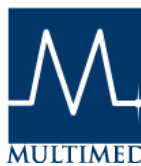

Supplement Figure 3: Body fat stores by bioimpedence assay

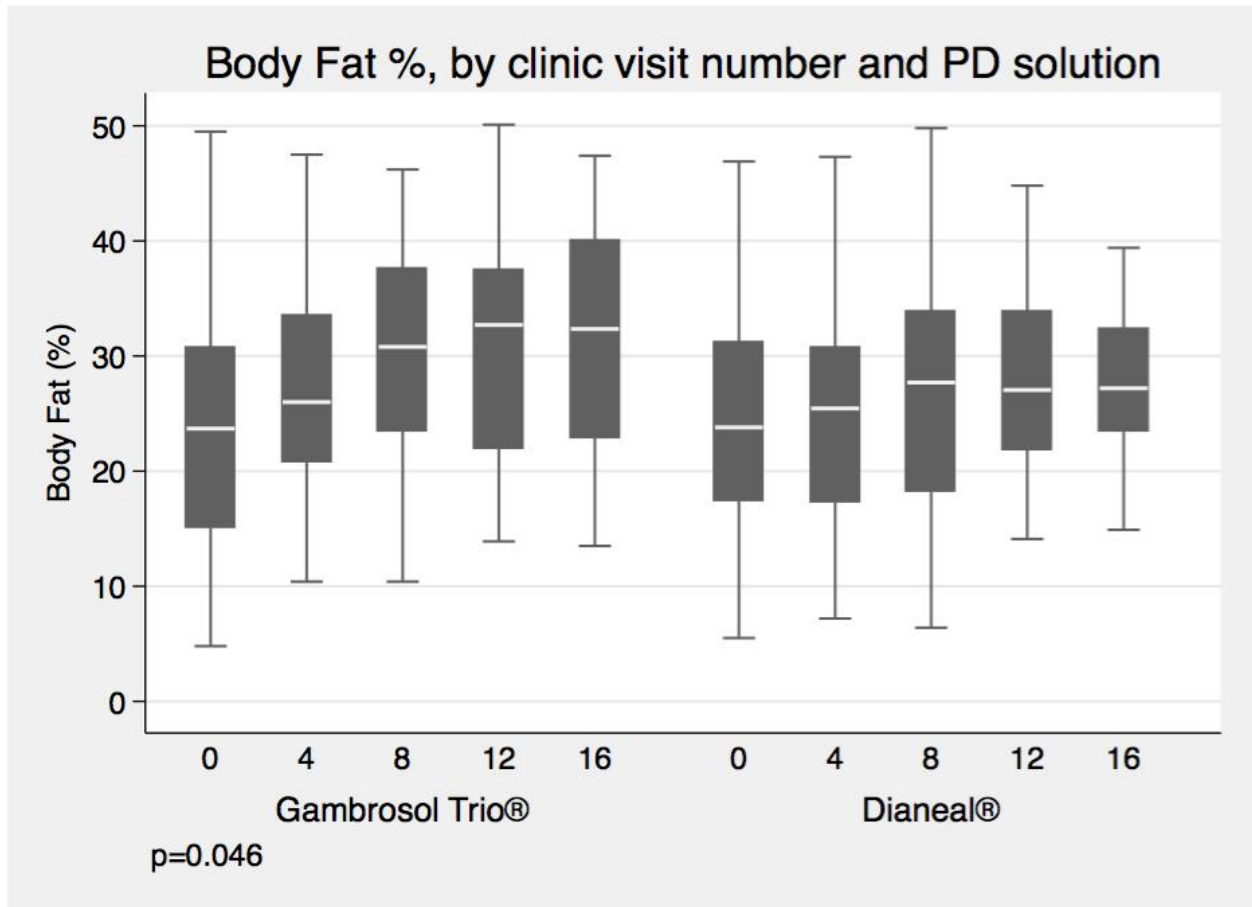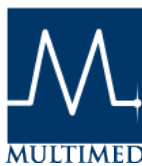

Supplement Figure 4: Peritoneal Ultrafiltration Volumes on Standardized Testing

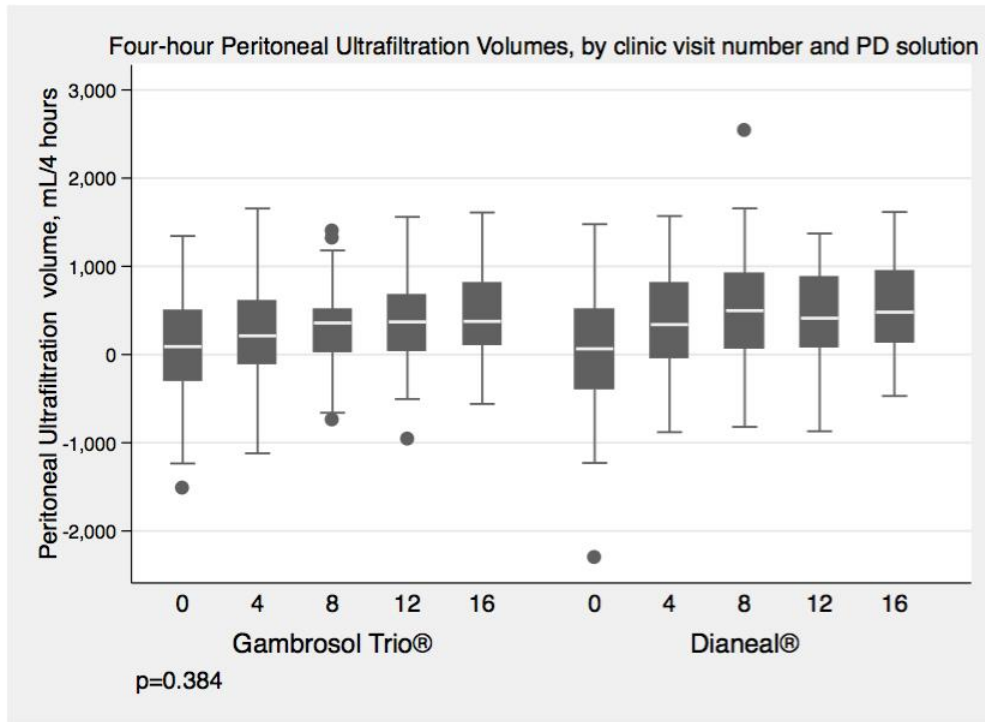

Supplement Figure 5: Peritoneal D/P Creatinine on Standardized Testing

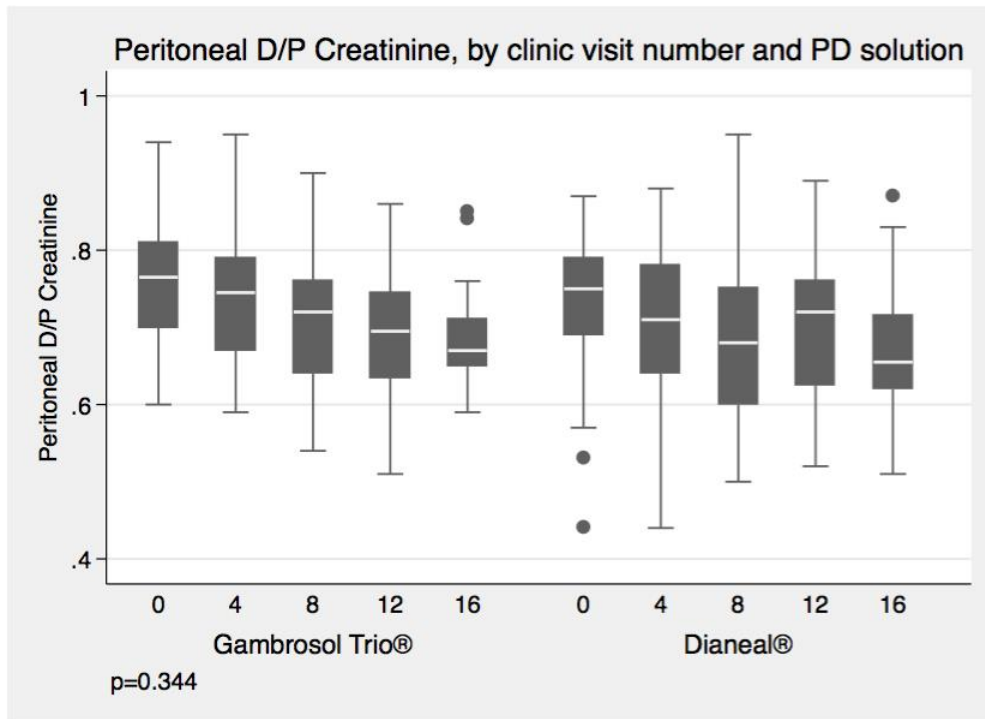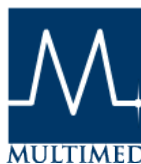

Supplement Figure 6: Sensitivity analysis of Primary Outcome in 46 patients eligible for but not receiving Icodextrin

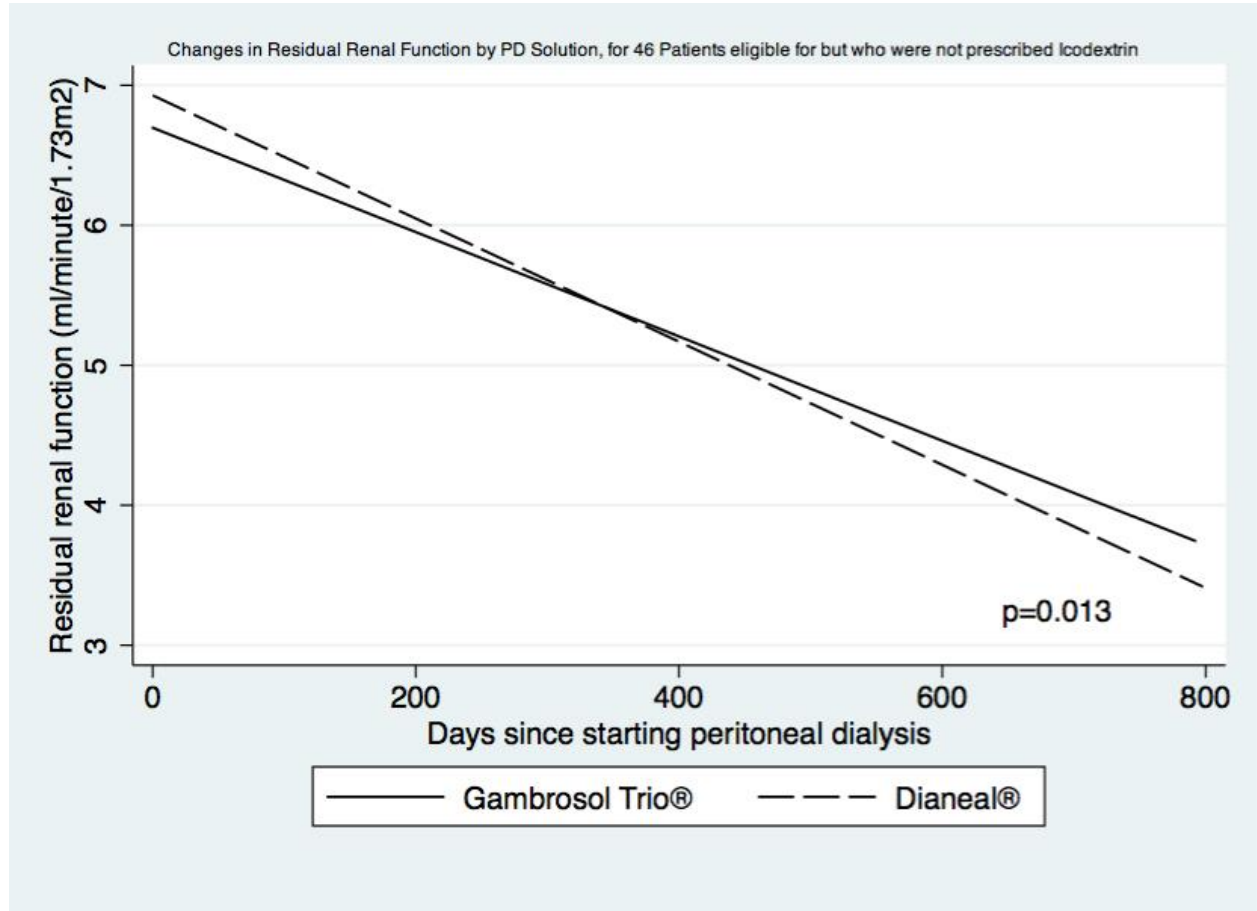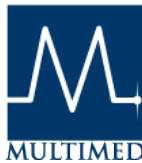

Supplement Figure 7a) and b): Sensitivity analyses of effects of peritonitis events on primary outcome

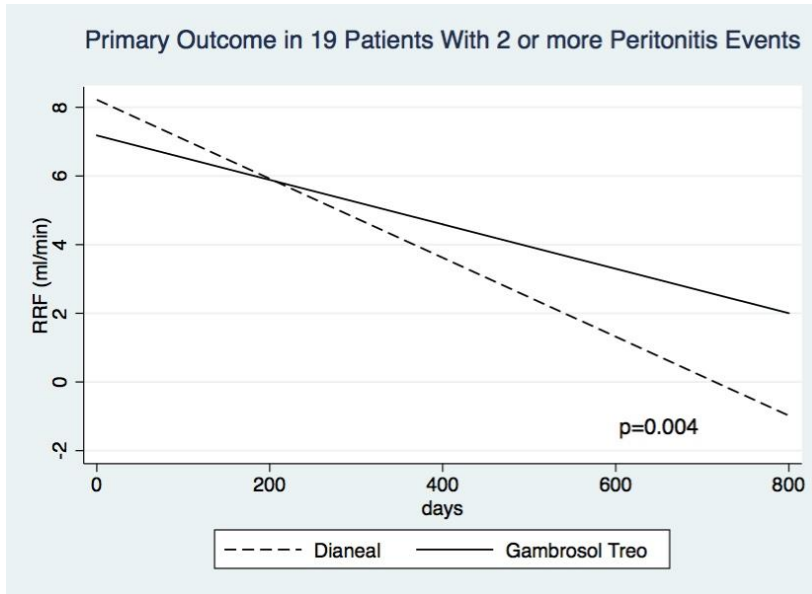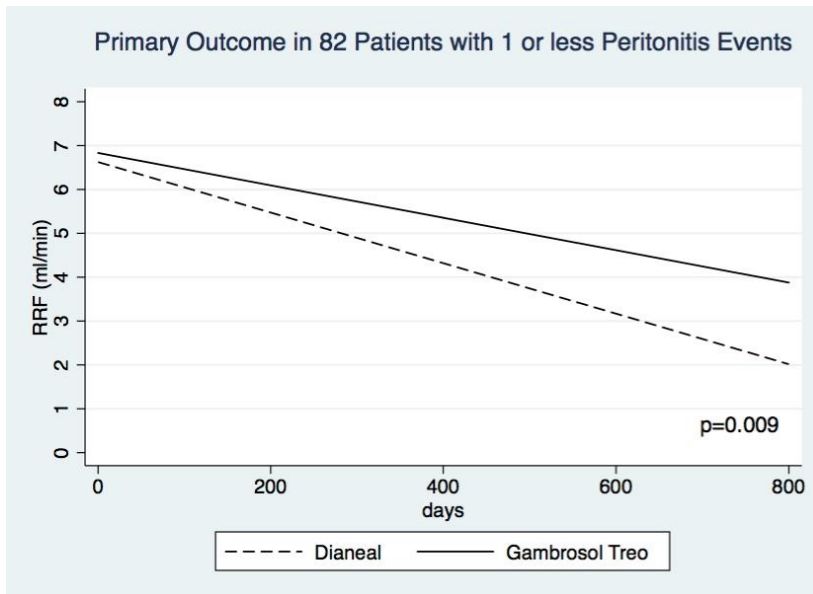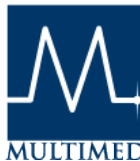

Supplement: supp_2015.00090_Supplemental_Material.pdf [file supp_2015.00090_Supplemental_Material.pdf]
